# Supplementary material for: Saturn-like charge-transfer complexes Li4&B36, Li5&B36+, and Li6&B362+: exohedral metalloborospherenes with a perfect cage-like B364−core
Source: Royal Society of Chemistry journal article supplement (doi:10.1039/c6cp01279e), 2016-01-01
Supplement: c6cp01279e1.pdf [file c6cp01279e1.pdf]

## Supporting Information

### **Saturn-Like Charge-Transfer Complexes $\text{Li}_4\text{B}_{36}$ , $\text{Li}_5\text{B}_{36}^+$ , and $\text{Li}_6\text{B}_{36}^{2+}$ : Exohedral Metalloborospherenes with A Perfect Cage-Like $\text{B}_{36}^{4-}$ Core \*\***

Wen-Juan Tian,<sup>a</sup> Qiang Chen,<sup>a</sup> Hai-Ru Li,<sup>a</sup> Miao Yan,<sup>a</sup> Yue-Wen Mu,<sup>a</sup> Hai-Gang Lu,<sup>\*a</sup>

Hua-Jin Zhai<sup>\*a</sup> and Si-Dian Li <sup>\*a</sup>

**Complete citation of ref. 29.**

- Figure S1.** Typical isomers of  $B_{36}^{4-}$  at the PBE0/6-311+G\* level. The relative energies are indicated in eV.
- Figures S2-S4.** Low-lying isomers of  $Li_4B_{36}$ ,  $Li_5B_{36}^+$  and  $Li_6B_{36}^{2+}$  at the PBE0/6-311+G\* level. Their relative energies are indicated in eV. Also shown are the relative energies at the single-point CCSD(T)//PBE0/6-311+G\* (in bracket).
- Figure S5.** Frontier molecular orbital of  $D_{2h}$   $Li_4\&B_{36}$  (**2**),  $C_{2v}$   $Li_5\&B_{36}^+$  (**3**), and  $T_h$   $Li_6\&B_{36}^{2+}$  (**4**) at the PBE0/6-311+G\* level.
- Figures S6-S8.** Born-Oppenheimer molecular dynamics simulations of  $D_{2h}$   $Li_4\&B_{36}$  (**2**),  $C_{2v}$   $Li_5\&B_{36}^+$  (**3**), and  $T_h$   $Li_6\&B_{36}^{2+}$  (**4**) at (a) 200K, (b) 400K, (c) 600K and (d) 800K for 30 ps, respectively. The root-mean-square-deviation (RMSD) and maximum bond length deviation (MAXD) values (on average) are indicated in Å.
- Figure S9.** Simulated (a) IR and (b) Raman spectra of  $D_{2h}$   $Li_4\&B_{36}$  (**2**),  $C_{2v}$   $Li_5\&B_{36}^+$  (**3**), and  $T_h$   $Li_6\&B_{36}^{2+}$  (**4**) compared with that of  $T_h$   $B_{36}^{4-}$  (**1**) at the PBE0/6-311+G\* level.
- Table S1.** The optimized coordinates of  $T_h$   $B_{36}^{4-}$  (**1**),  $D_{2h}$   $Li_4\&B_{36}$  (**2**),  $C_{2v}$   $Li_5\&B_{36}^+$  (**3**),  $T_h$   $Li_6\&B_{36}^{2+}$  (**4**),  $D_{2h}$   $Li_2\&[Ca@B_{36}]$  (**5**),  $C_{2v}$   $Li_3\&[Ca@B_{36}]^+$  (**6**), and  $D_{2h}$   $Li_4\&[Ca@B_{36}]^{2+}$  (**7**) at the PBE0/6-311+G\* level.

### Complete citation of ref. 29

29 M. J. Frisch, G. W. Trucks, H. B. Schlegel, G. E. Scuseria, M. A. Robb, J. R. Cheeseman, G. Scalmani, V. Barone, B. Mennucci, G. A. Petersson, H. Nakatsuji, M. Caricato, X. Li, H. P. Hratchian, A. F. Izmaylov, J. Bloino, G. Zheng, J. L. Sonnenberg, M. Hada, M. Ehara, K. Toyota, R. Fukuda, J. Hasegawa, M. Ishida, T. Nakajima, Y. Honda, O. Kitao, H. Nakai, T. Vreven, J. A. Montgomery, Jr., J. E. Peralta, F. Ogliaro, M. Bearpark, J. J. Heyd, E. Brothers, K. N. Kudin, V. N. Staroverov, R. Kobayashi, J. Normand, K. Raghavachari, A. Rendell, J. C. Burant, S. S. Iyengar, J. Tomasi, M. Cossi, N. Rega, J. M. Millam, M. Klene, J. E. Knox, J. B. Cross, V. Bakken, C. Adamo, J. Jaramillo, R. Gomperts, R. E. Stratmann, O. Yazyev, A. J. Austin, R. Cammi, C. Pomelli, J. W. Ochterski, R. L. Martin, K. Morokuma, V. G. Zakrzewski, G. A. Voth, P. Salvador, J. J. Dannenberg, S. Dapprich, A. D. Daniels, Ö. Farkas, J. B. Foresman, J. V. Ortiz, J. Cioslowski and D. J. Fox, *Gaussian 09*, revision D.01, Gaussian, Inc., Wallingford, CT, 2009.

**Figure S1.** Typical isomers of  $B_{36}^{4-}$  at the PBE0/6-311+G\* level. The relative energies are indicated in eV.

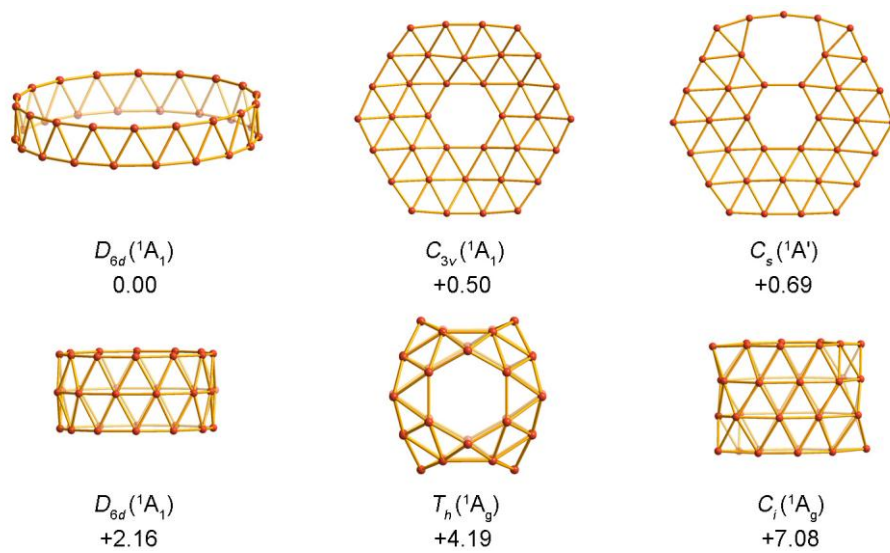

**Figure S2.** Low-lying isomers of  $\text{Li}_4\text{B}_{36}$  at the PBE0/6-311+G\* level. Their relative energies are indicated in eV. Also shown are the relative energies at the single-point CCSD(T)// PBE0/6-311+G\* (in bracket).

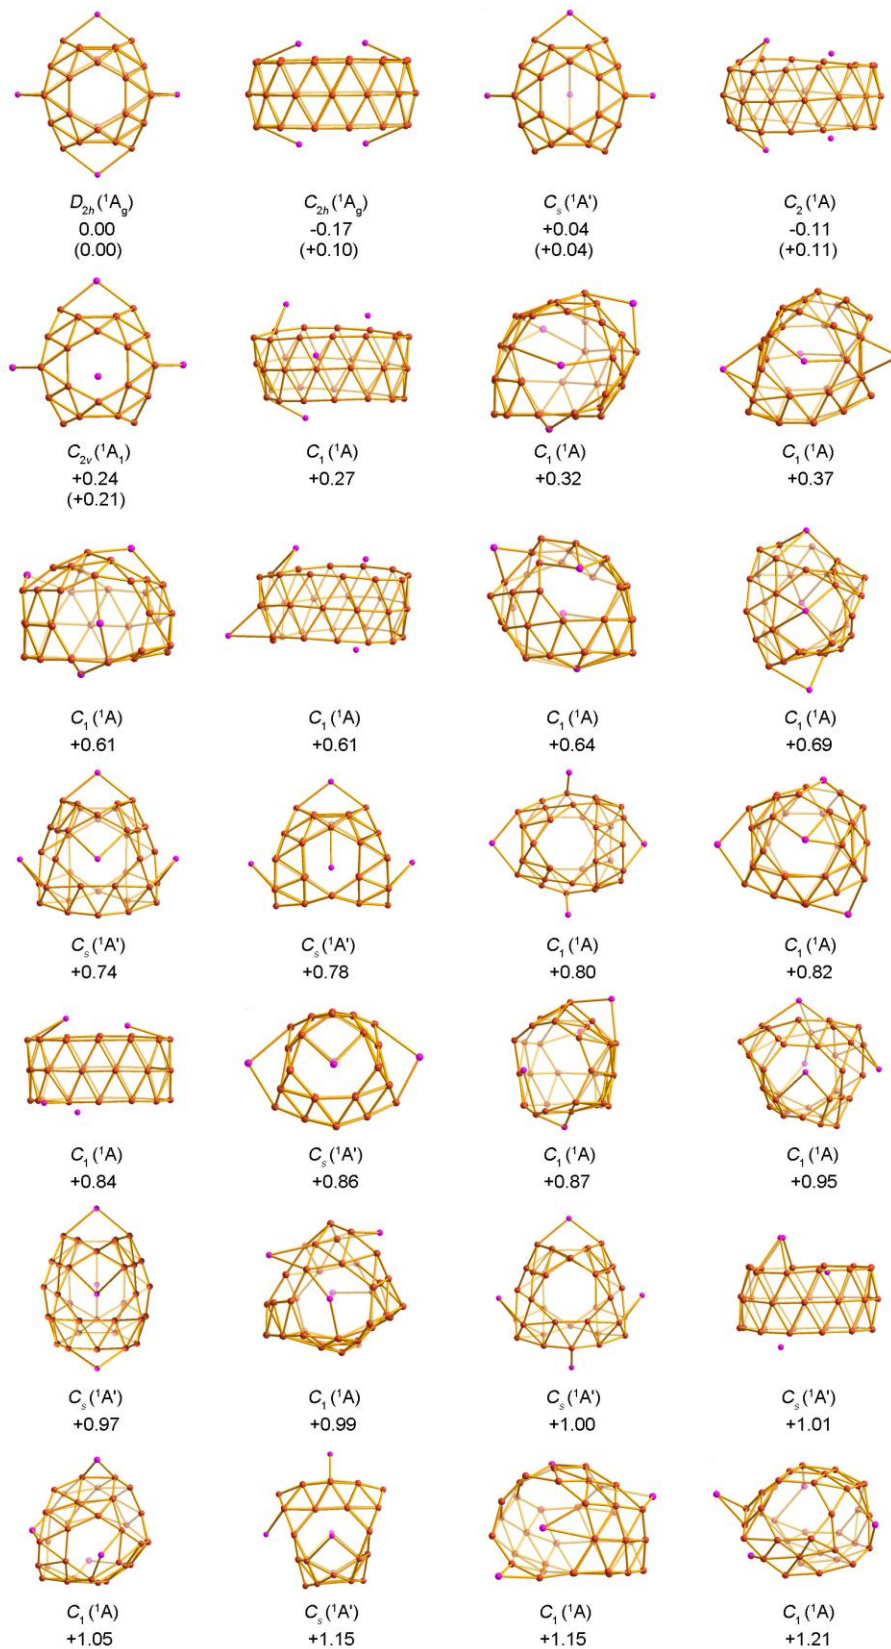

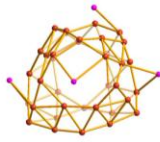

$C_1$  ('A')  
+1.22

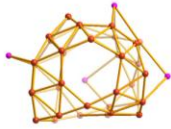

$C_1$  ('A')  
+1.26

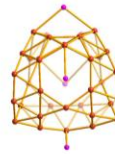

$C_s$  ('A')  
+1.27

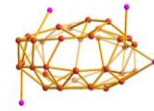

$C_1$  ('A')  
+1.27

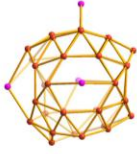

$C_1$  ('A')  
+1.37

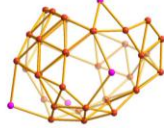

$C_1$  ('A')  
+1.44

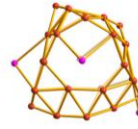

$C_1$  ('A')  
+1.49

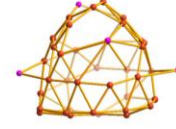

$C_1$  ('A')  
+1.51

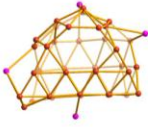

$C_1$  ('A')  
+1.52

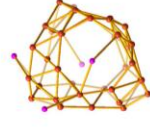

$C_1$  ('A')  
+1.52

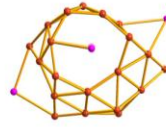

$C_s$  ('A')  
+1.59

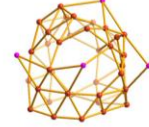

$C_1$  ('A')  
+1.60

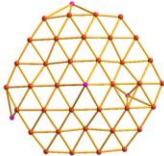

$C_1$  ('A')  
+1.63

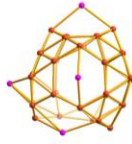

$C_1$  ('A')  
+1.64

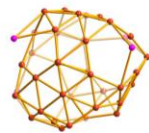

$C_1$  ('A')  
+1.73

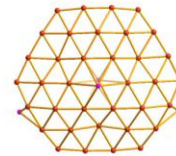

$C_1$  ('A')  
+1.79

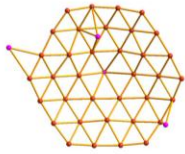

$C_1$  ('A')  
+1.80

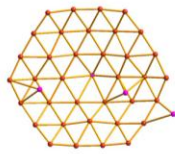

$C_1$  ('A')  
+1.83

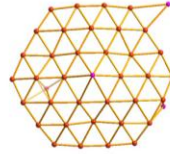

$C_1$  ('A')  
+1.85

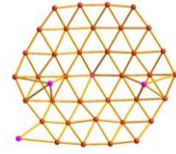

$C_1$  ('A')  
+1.86

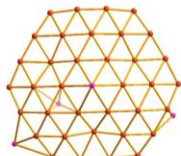

$C_1$  ('A')  
+1.86

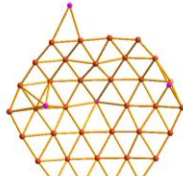

$C_1$  ('A')  
+1.89

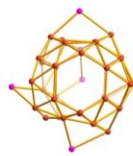

$C_1$  ('A')  
+1.90

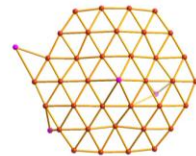

$C_1$  ('A')  
+1.90

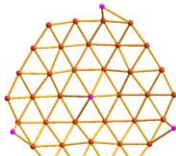

$C_1$  ('A')  
+1.93

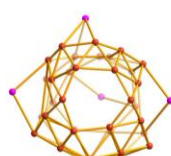

$C_1$  ('A')  
+1.94

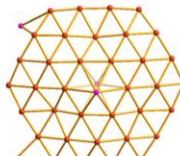

$C_1$  ('A')  
+1.95

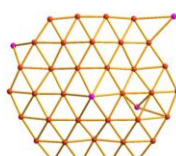

$C_1$  ('A')  
+1.96

**Figure S3.** Low-lying isomers of  $\text{Li}_5\text{B}_{36}^+$  at the PBE0/6-311+G\* level. Their relative energies are indicated in eV. Also shown are the relative energies at the single-point CCSD(T)// PBE0/6-311+G\* (in bracket).

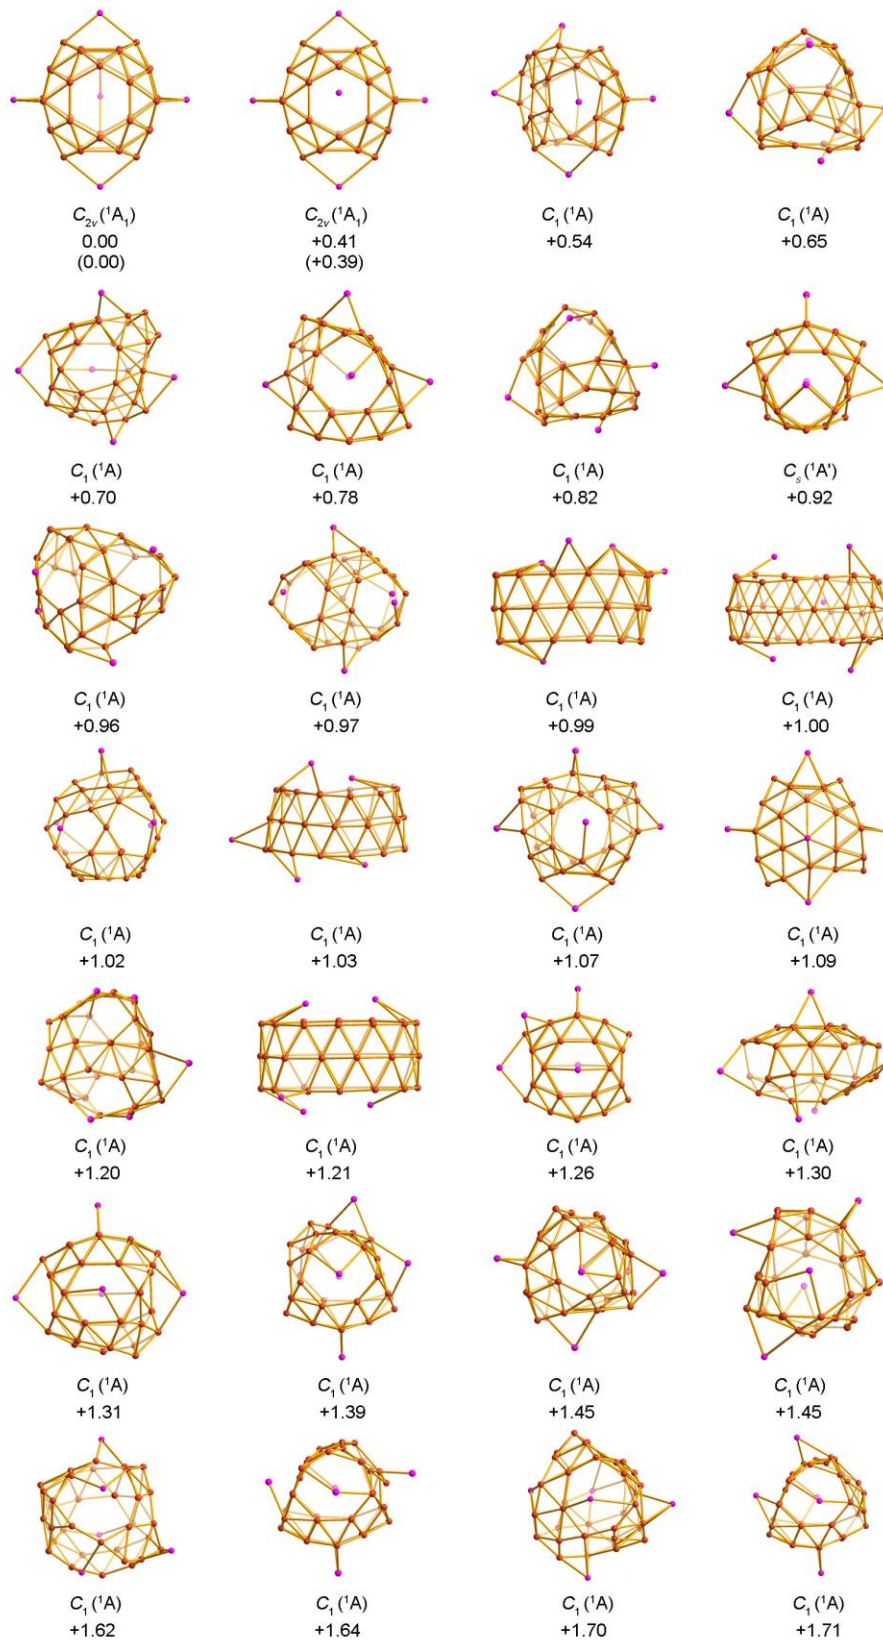

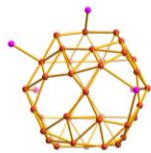

$C_1(1A)$   
+1.76

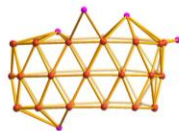

$C_1(1A)$   
+1.80

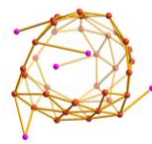

$C_1(1A)$   
+1.86

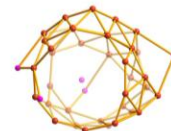

$C_1(1A)$   
+1.93

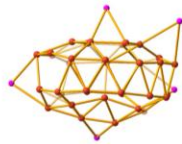

$C_1(1A)$   
+1.94

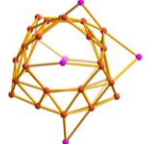

$C_1(1A)$   
+1.97

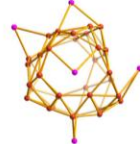

$C_1(1A)$   
+2.03

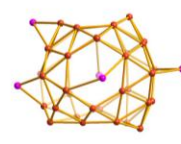

$C_1(1A)$   
+2.05

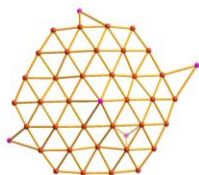

$C_1(1A)$   
+2.22

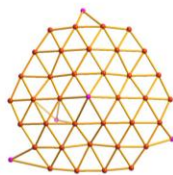

$C_1(1A)$   
+2.22

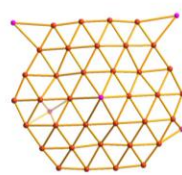

$C_1(1A)$   
+2.23

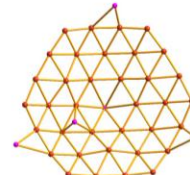

$C_1(1A)$   
+2.23

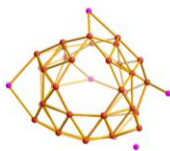

$C_1(1A)$   
+2.27

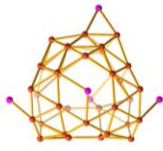

$C_1(1A)$   
+2.30

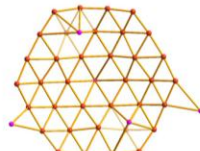

$C_1(1A)$   
+2.37

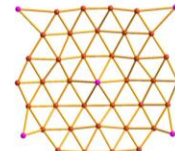

$C_5(1A)$   
+2.42

---



**Figure S4.** Low-lying isomers of  $\text{Li}_6\text{B}_{36}^{2+}$  at the PBE0/6-311+G\* level. Their relative energies are indicated in eV. Also shown are the relative energies at the single-point CCSD(T)// PBE0/6-311+G\* (in bracket).

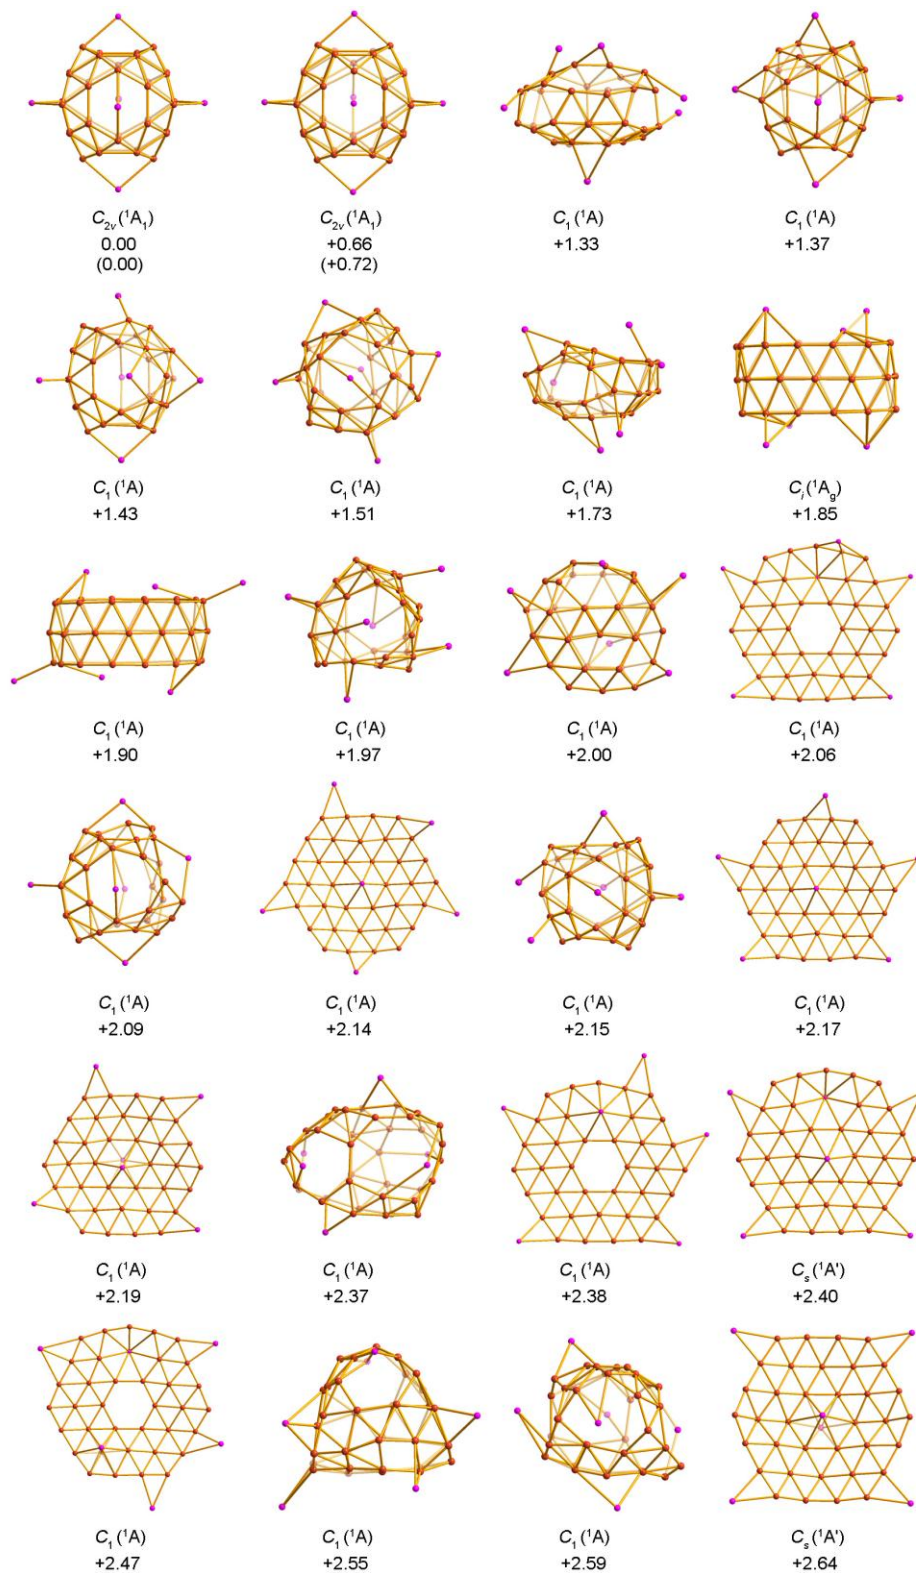

**Figure S5.** Frontier molecular orbital of  $D_{2h}$   $\text{Li}_4\&\text{B}_{36}$  (**2**),  $C_{2v}$   $\text{Li}_5\&\text{B}_{36}^+$  (**3**), and  $T_h$   $\text{Li}_6\&\text{B}_{36}^{2+}$  (**4**) at the PBE0/6-311+G\* level.

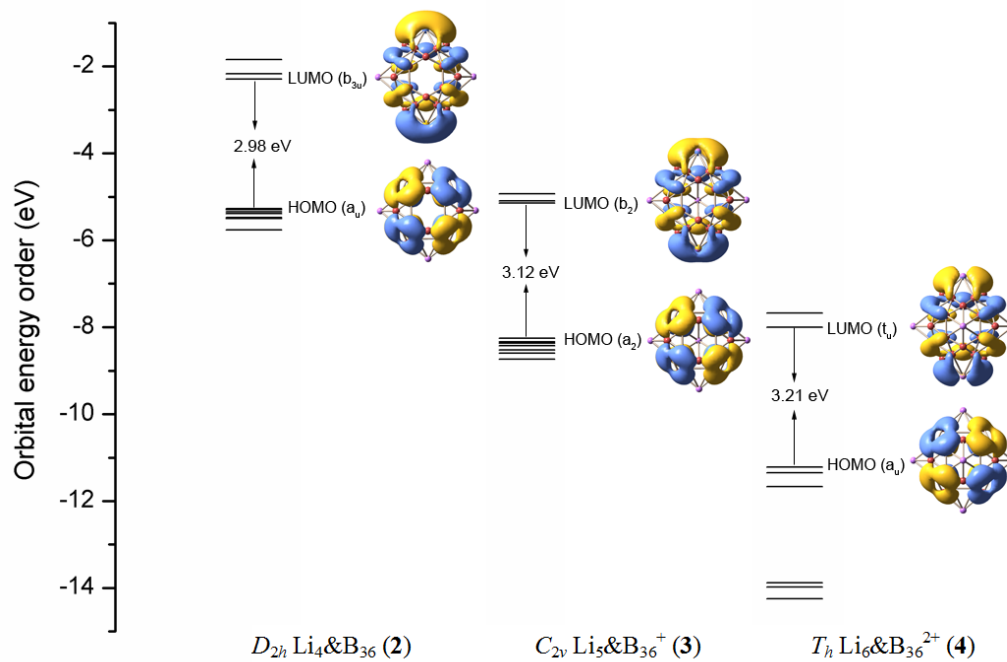

**Figure S6.** Born-Oppenheimer molecular dynamics simulations of  $D_{2h}$   $\text{Li}_4\text{B}_{36}$  (**2**) at (a) 200K, (b) 400K, (c) 600K and (d) 800K for 30 ps. The root-mean-square-deviation (RMSD) and maximum bond length deviation (MAXD) values (on average) are indicated in Å.

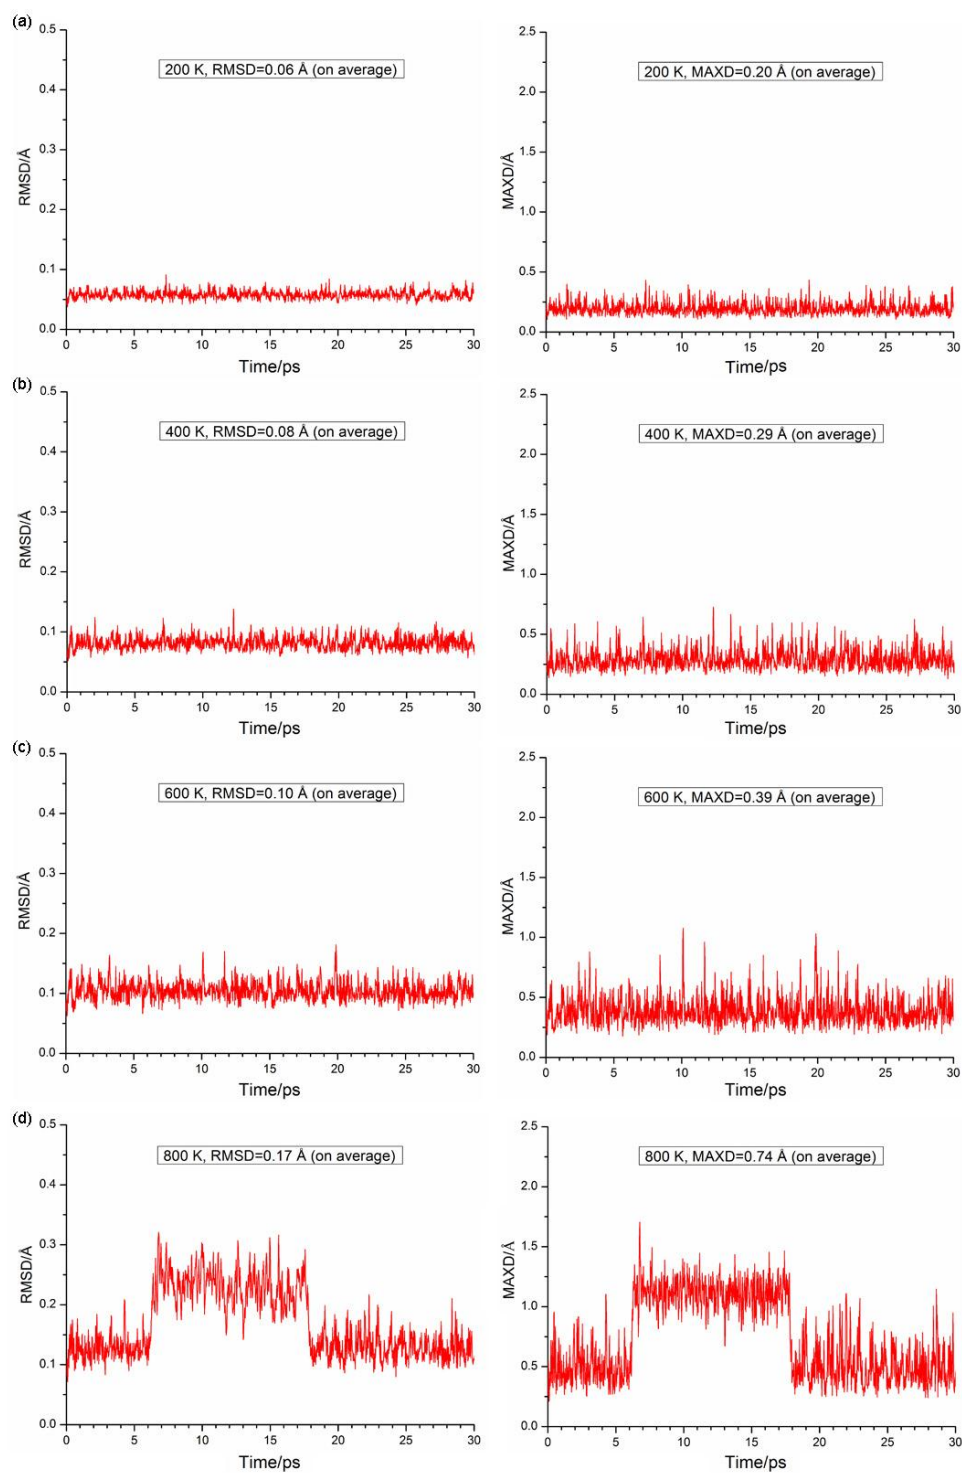

**Figure S7.** Born-Oppenheimer molecular dynamics simulations of  $C_{2v}$   $Li_5B_{36}^+$  (**3**) at (a) 200K, (b) 400K, (c) 600K and (d) 800K for 30 ps. The root-mean-square-deviation (RMSD) and maximum bond length deviation (MAXD) values (on average) are indicated in Å.

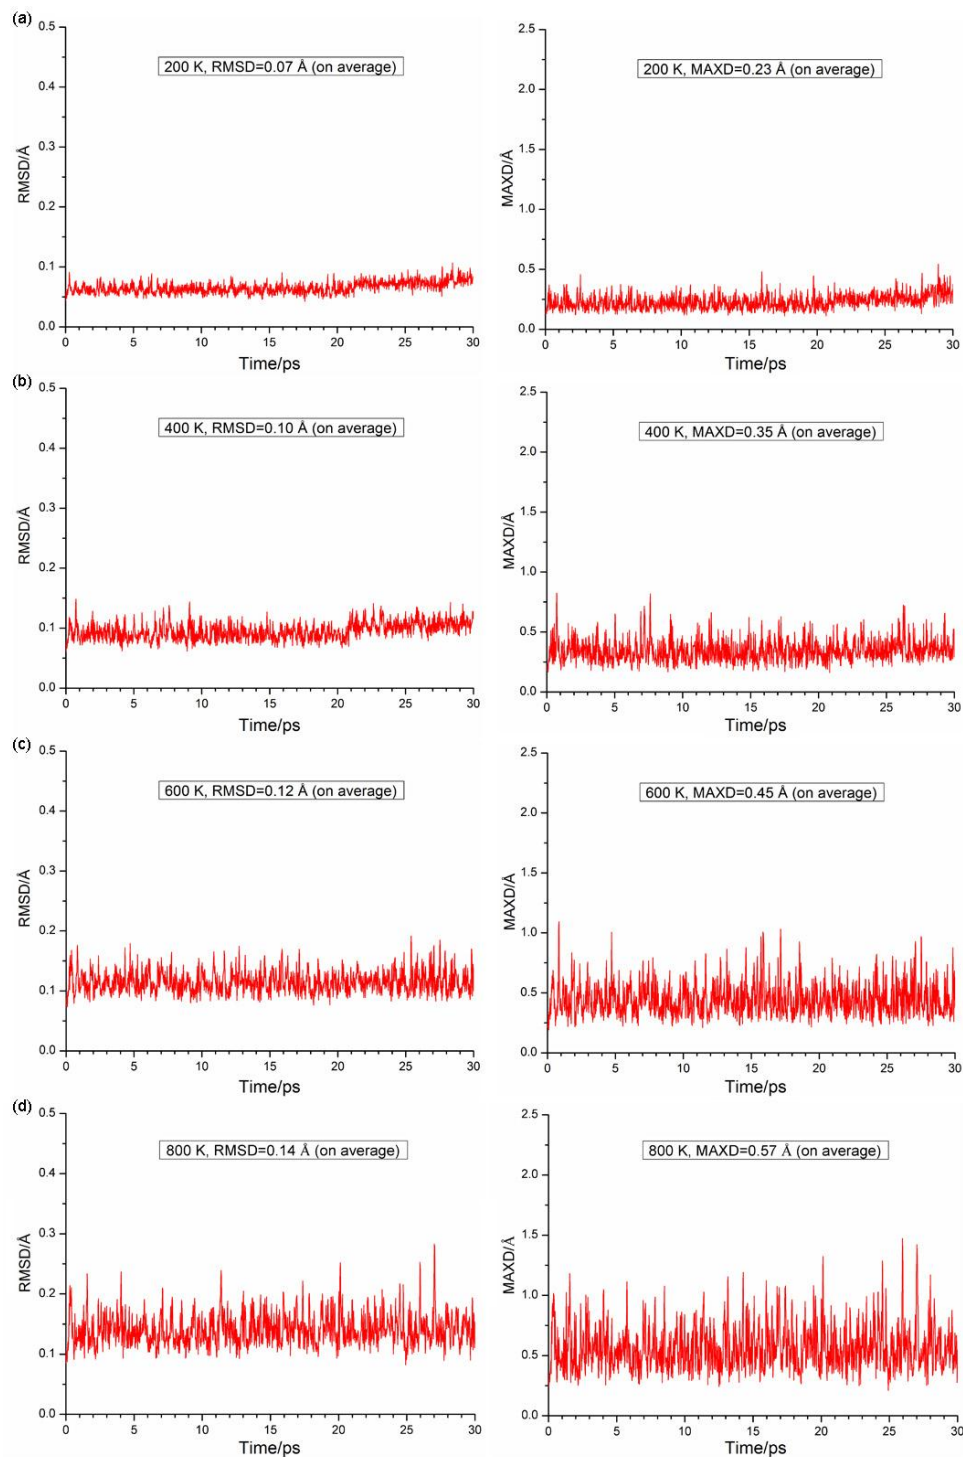

**Figure S8.** Born-Oppenheimer molecular dynamics simulations of  $T_h \text{Li}_6\text{B}_{36}^{2+}$  (**4**) at (a) 200K, (b) 400K, (c) 600K and (d) 800K for 30 ps. The root-mean-square-deviation (RMSD) and maximum bond length deviation (MAXD) values (on average) are indicated in Å.

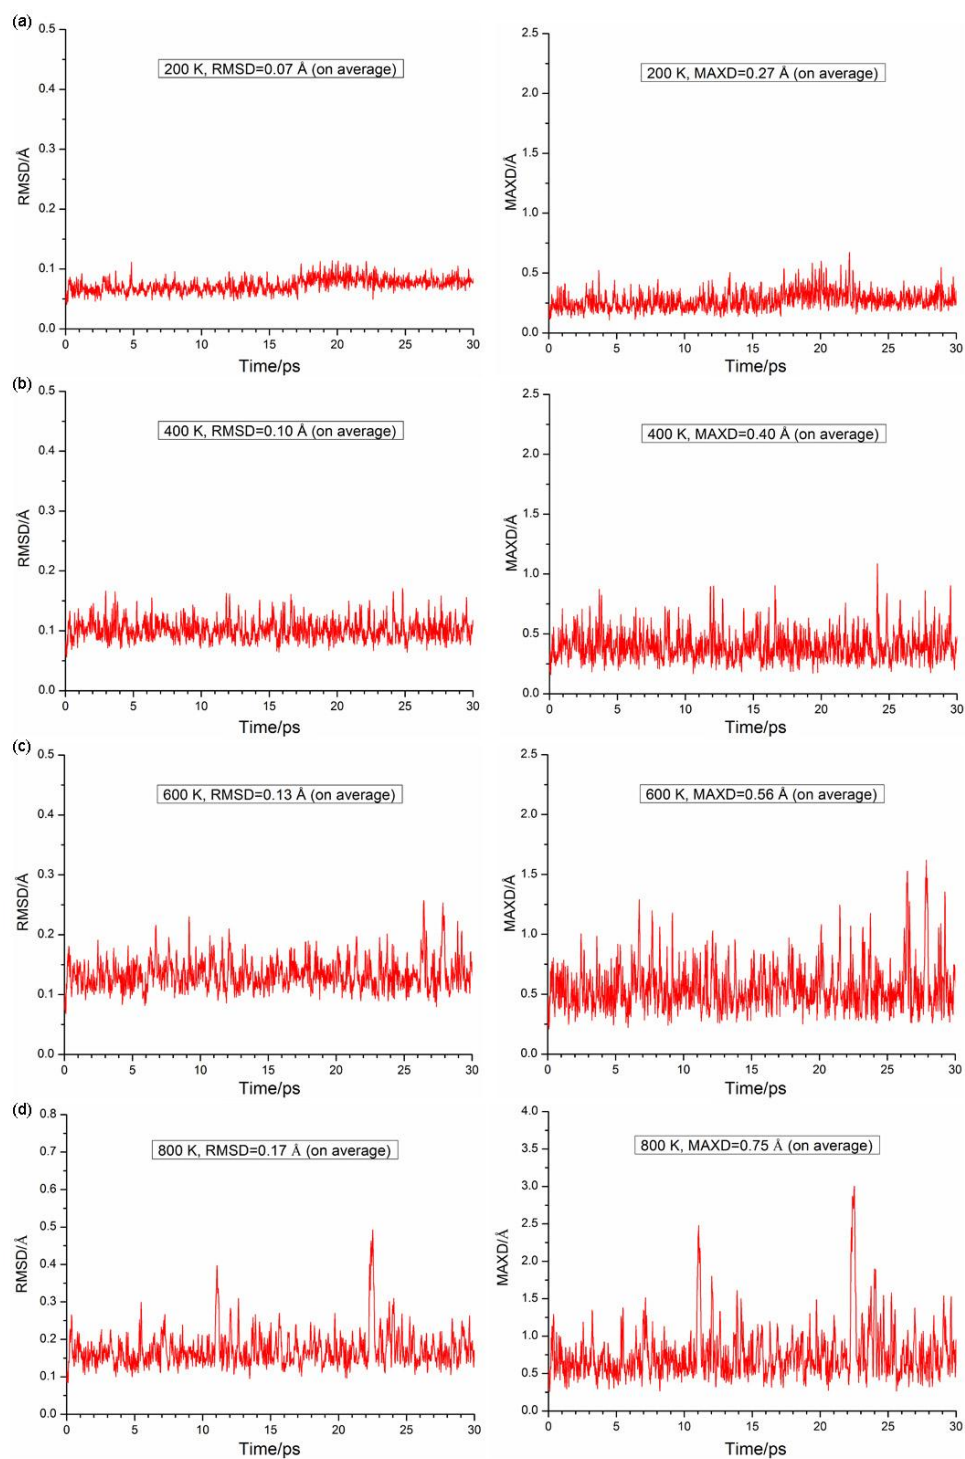

**Figure S9.** Simulated (a) IR and (b) Raman spectra of  $D_{2h}$   $\text{Li}_4\text{B}_3\text{O}_{10}$  (2),  $C_{2v}$   $\text{Li}_5\text{B}_3\text{O}_{10}$  (3), and  $T_h$   $\text{Li}_6\text{B}_3\text{O}_{10}^{2+}$  (4) compared with that of  $T_h$   $\text{B}_3\text{O}_6^{4-}$  (1) at the PBE0/6-311+G\* level.

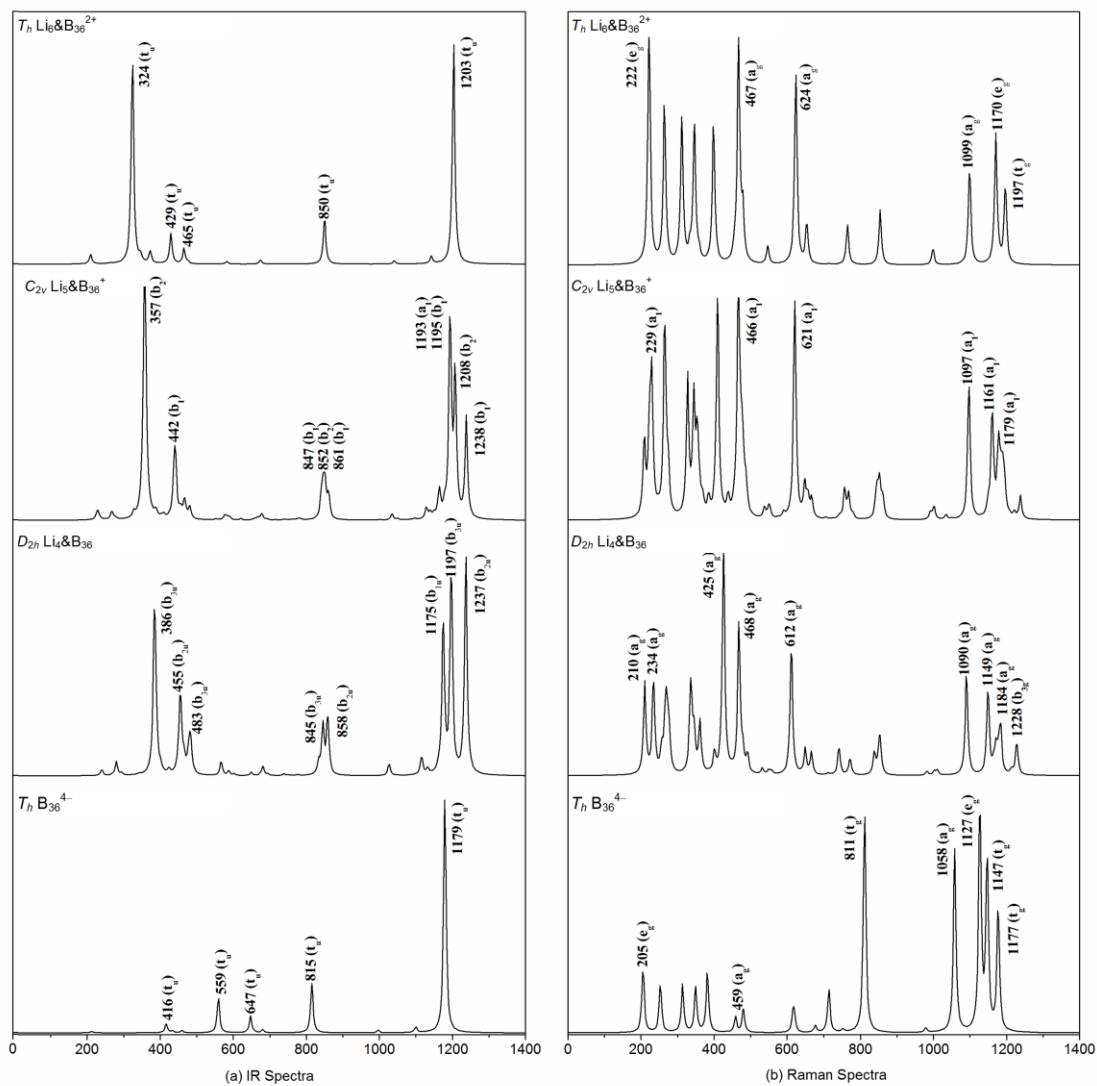

**Table S1.** The optimized coordinates of  $T_h B_{36}^{4-}$  (1),  $D_{2h} Li_4\&B_{36}$  (2),  $C_{2v} Li_5\&B_{36}^+$  (3),  $T_h Li_6\&B_{36}^{2+}$  (4),  $D_{2h} Li_2\&[Ca@B_{36}]$  (5),  $C_{2v} Li_3\&[Ca@B_{36}]^+$  (6), and  $D_{2h} Li_4\&[Ca@ B_{36}]^{2+}$  (7) at the PBE0/6-311+G\* level.

1.  $T_h B_{36}^{4-}$  ( $^1A_g$ )

|   |             |             |             |
|---|-------------|-------------|-------------|
| B | 0.00000000  | 1.67243500  | 2.65590000  |
| B | 0.00000000  | -1.67243500 | -2.65590000 |
| B | -2.65590000 | 0.00000000  | -1.67243500 |
| B | -1.67243500 | 2.65590000  | 0.00000000  |
| B | -0.89192500 | -2.30079400 | 1.39659700  |
| B | 0.00000000  | -1.67243500 | 2.65590000  |
| B | -1.39659700 | -0.89192500 | -2.30079400 |
| B | -1.39659700 | 0.89192500  | 2.30079400  |
| B | -1.39659700 | 0.89192500  | -2.30079400 |
| B | -0.89192500 | -2.30079400 | -1.39659700 |
| B | -0.89192500 | 2.30079400  | 1.39659700  |
| B | -0.89192500 | 2.30079400  | -1.39659700 |
| B | 0.00000000  | 1.67243500  | -2.65590000 |
| B | -2.30079400 | 1.39659700  | -0.89192500 |
| B | -1.67243500 | -2.65590000 | 0.00000000  |
| B | -1.39659700 | -0.89192500 | 2.30079400  |
| B | -2.30079400 | 1.39659700  | 0.89192500  |
| B | -2.30079400 | -1.39659700 | -0.89192500 |
| B | -2.65590000 | 0.00000000  | 1.67243500  |
| B | -2.30079400 | -1.39659700 | 0.89192500  |
| B | 2.65590000  | 0.00000000  | -1.67243500 |
| B | 1.67243500  | -2.65590000 | 0.00000000  |
| B | 0.89192500  | 2.30079400  | 1.39659700  |
| B | 1.39659700  | 0.89192500  | -2.30079400 |
| B | 1.39659700  | -0.89192500 | 2.30079400  |
| B | 1.39659700  | -0.89192500 | -2.30079400 |
| B | 0.89192500  | 2.30079400  | -1.39659700 |
| B | 0.89192500  | -2.30079400 | 1.39659700  |
| B | 0.89192500  | -2.30079400 | -1.39659700 |
| B | 2.30079400  | -1.39659700 | -0.89192500 |
| B | 1.67243500  | 2.65590000  | 0.00000000  |
| B | 1.39659700  | 0.89192500  | 2.30079400  |
| B | 2.30079400  | -1.39659700 | 0.89192500  |
| B | 2.30079400  | 1.39659700  | -0.89192500 |
| B | 2.65590000  | 0.00000000  | 1.67243500  |
| B | 2.30079400  | 1.39659700  | 0.89192500  |

2.  $D_{2h}$  B<sub>36</sub>Li<sub>4</sub> (<sup>1</sup>A<sub>g</sub>)

|    |             |             |             |
|----|-------------|-------------|-------------|
| B  | 2.64640600  | 1.68535300  | 0.00000000  |
| B  | -2.64640600 | -1.68535300 | 0.00000000  |
| B  | -1.65829800 | 0.00000000  | 2.63479400  |
| B  | 0.00000000  | 2.62871500  | 1.68725900  |
| B  | 1.39121200  | -2.28137100 | 0.88950600  |
| B  | 2.64640600  | -1.68535300 | 0.00000000  |
| B  | -2.29297900 | -0.88632100 | 1.39761400  |
| B  | 2.29297900  | 0.88632100  | 1.39761400  |
| B  | -2.29297900 | 0.88632100  | 1.39761400  |
| B  | -1.39121200 | -2.28137100 | 0.88950600  |
| B  | 1.39121200  | 2.28137100  | 0.88950600  |
| B  | -1.39121200 | 2.28137100  | 0.88950600  |
| B  | -2.64640600 | 1.68535300  | 0.00000000  |
| B  | -0.88779500 | 1.38535700  | 2.29812300  |
| B  | 0.00000000  | -2.62871500 | 1.68725900  |
| B  | 2.29297900  | -0.88632100 | 1.39761400  |
| B  | 0.88779500  | 1.38535700  | 2.29812300  |
| B  | -0.88779500 | -1.38535700 | 2.29812300  |
| B  | 1.65829800  | 0.00000000  | 2.63479400  |
| B  | 0.88779500  | -1.38535700 | 2.29812300  |
| B  | -1.65829800 | 0.00000000  | -2.63479400 |
| B  | 0.00000000  | -2.62871500 | -1.68725900 |
| B  | 1.39121200  | 2.28137100  | -0.88950600 |
| B  | -2.29297900 | 0.88632100  | -1.39761400 |
| B  | 2.29297900  | -0.88632100 | -1.39761400 |
| B  | -2.29297900 | -0.88632100 | -1.39761400 |
| B  | -1.39121200 | 2.28137100  | -0.88950600 |
| B  | 1.39121200  | -2.28137100 | -0.88950600 |
| B  | -1.39121200 | -2.28137100 | -0.88950600 |
| B  | -0.88779500 | -1.38535700 | -2.29812300 |
| B  | 0.00000000  | 2.62871500  | -1.68725900 |
| B  | 2.29297900  | 0.88632100  | -1.39761400 |
| B  | 0.88779500  | -1.38535700 | -2.29812300 |
| B  | -0.88779500 | 1.38535700  | -2.29812300 |
| B  | 1.65829800  | 0.00000000  | -2.63479400 |
| B  | 0.88779500  | 1.38535700  | -2.29812300 |
| Li | 0.00000000  | -3.92522700 | 0.00000000  |
| Li | 0.00000000  | 3.92522700  | 0.00000000  |
| Li | -3.94536200 | 0.00000000  | 0.00000000  |
| Li | 3.94536200  | 0.00000000  | 0.00000000  |



3.  $C_{2v} B_{36}Li_5^+ (^1A_1)$

|    |             |             |             |
|----|-------------|-------------|-------------|
| B  | -1.67724300 | 2.64074500  | -0.05696900 |
| B  | 1.67724300  | -2.64074500 | -0.05696900 |
| B  | 0.00000000  | -1.67337400 | 2.57793200  |
| B  | -2.64213800 | 0.00000000  | 1.62057100  |
| B  | 2.29952800  | 1.40281800  | 0.82951400  |
| B  | 1.67724300  | 2.64074500  | -0.05696900 |
| B  | 0.88715100  | -2.28142200 | 1.33103700  |
| B  | -0.88715100 | 2.28142200  | 1.33103700  |
| B  | -0.88715100 | -2.28142200 | 1.33103700  |
| B  | 2.29952800  | -1.40281800 | 0.82951400  |
| B  | -2.29952800 | 1.40281800  | 0.82951400  |
| B  | -2.29952800 | -1.40281800 | 0.82951400  |
| B  | -1.67724300 | -2.64074500 | -0.05696900 |
| B  | -1.39312300 | -0.88383300 | 2.22713800  |
| B  | 2.64213800  | 0.00000000  | 1.62057100  |
| B  | 0.88715100  | 2.28142200  | 1.33103700  |
| B  | -1.39312300 | 0.88383300  | 2.22713800  |
| B  | 1.39312300  | -0.88383300 | 2.22713800  |
| B  | 0.00000000  | 1.67337400  | 2.57793200  |
| B  | 1.39312300  | 0.88383300  | 2.22713800  |
| B  | 0.00000000  | -1.66405100 | -2.69175500 |
| B  | 2.61539200  | 0.00000000  | -1.73574700 |
| B  | -2.26597300 | 1.38298400  | -0.94545300 |
| B  | -0.88598000 | -2.30437300 | -1.46167600 |
| B  | 0.88598000  | 2.30437300  | -1.46167600 |
| B  | 0.88598000  | -2.30437300 | -1.46167600 |
| B  | -2.26597300 | -1.38298400 | -0.94545300 |
| B  | 2.26597300  | 1.38298400  | -0.94545300 |
| B  | 2.26597300  | -1.38298400 | -0.94545300 |
| B  | 1.38446100  | -0.89193700 | -2.35870600 |
| B  | -2.61539200 | 0.00000000  | -1.73574700 |
| B  | -0.88598000 | 2.30437300  | -1.46167600 |
| B  | 1.38446100  | 0.89193700  | -2.35870600 |
| B  | -1.38446100 | -0.89193700 | -2.35870600 |
| B  | 0.00000000  | 1.66405100  | -2.69175500 |
| B  | -1.38446100 | 0.89193700  | -2.35870600 |
| Li | 3.99465700  | 0.00000000  | -0.07558800 |
| Li | -3.99465700 | 0.00000000  | -0.07558800 |
| Li | 0.00000000  | -4.00889700 | -0.06535100 |
| Li | 0.00000000  | 4.00889700  | -0.06535100 |
| Li | 0.00000000  | 0.00000000  | 3.94597900  |

4.  $T_h \text{B}_{36}\text{Li}_6^{2+} (^1\text{A}_g)$

|    |             |             |             |
|----|-------------|-------------|-------------|
| B  | 2.63385500  | 1.66932100  | 0.00000000  |
| B  | -2.63385500 | -1.66932100 | 0.00000000  |
| B  | -1.66932100 | 0.00000000  | 2.63385500  |
| B  | 0.00000000  | 2.63385500  | 1.66932100  |
| B  | 1.39589400  | -2.28921500 | 0.88724200  |
| B  | 2.63385500  | -1.66932100 | 0.00000000  |
| B  | -2.28921500 | -0.88724200 | 1.39589400  |
| B  | 2.28921500  | 0.88724200  | 1.39589400  |
| B  | -2.28921500 | 0.88724200  | 1.39589400  |
| B  | -1.39589400 | -2.28921500 | 0.88724200  |
| B  | 1.39589400  | 2.28921500  | 0.88724200  |
| B  | -1.39589400 | 2.28921500  | 0.88724200  |
| B  | -2.63385500 | 1.66932100  | 0.00000000  |
| B  | -0.88724200 | 1.39589400  | 2.28921500  |
| B  | 0.00000000  | -2.63385500 | 1.66932100  |
| B  | 2.28921500  | -0.88724200 | 1.39589400  |
| B  | 0.88724200  | 1.39589400  | 2.28921500  |
| B  | -0.88724200 | -1.39589400 | 2.28921500  |
| B  | 1.66932100  | 0.00000000  | 2.63385500  |
| B  | 0.88724200  | -1.39589400 | 2.28921500  |
| B  | -1.66932100 | 0.00000000  | -2.63385500 |
| B  | 0.00000000  | -2.63385500 | -1.66932100 |
| B  | 1.39589400  | 2.28921500  | -0.88724200 |
| B  | -2.28921500 | 0.88724200  | -1.39589400 |
| B  | 2.28921500  | -0.88724200 | -1.39589400 |
| B  | -2.28921500 | -0.88724200 | -1.39589400 |
| B  | -1.39589400 | 2.28921500  | -0.88724200 |
| B  | 1.39589400  | -2.28921500 | -0.88724200 |
| B  | -1.39589400 | -2.28921500 | -0.88724200 |
| B  | -0.88724200 | -1.39589400 | -2.28921500 |
| B  | 0.00000000  | 2.63385500  | -1.66932100 |
| B  | 2.28921500  | 0.88724200  | -1.39589400 |
| B  | 0.88724200  | -1.39589400 | -2.28921500 |
| B  | -0.88724200 | 1.39589400  | -2.28921500 |
| B  | 1.66932100  | 0.00000000  | -2.63385500 |
| B  | 0.88724200  | 1.39589400  | -2.28921500 |
| Li | 0.00000000  | 0.00000000  | 4.07918600  |
| Li | 0.00000000  | 4.07918600  | 0.00000000  |
| Li | 0.00000000  | 0.00000000  | -4.07918600 |
| Li | 4.07918600  | 0.00000000  | 0.00000000  |
| Li | 0.00000000  | -4.07918600 | 0.00000000  |
| Li | -4.07918600 | 0.00000000  | 0.00000000  |

5.  $D_{2h}$  Li<sub>2</sub>&[Ca@B<sub>36</sub>] (<sup>1</sup>A<sub>g</sub>)

|    |             |             |             |
|----|-------------|-------------|-------------|
| B  | 2.64092000  | 0.00000000  | -1.66298200 |
| B  | -2.64092000 | 0.00000000  | 1.66298200  |
| B  | -1.63319900 | 2.63983200  | 0.00000000  |
| B  | 0.00000000  | 1.63258100  | -2.62079400 |
| B  | 1.41139700  | 0.89273400  | 2.30404200  |
| B  | 2.64092000  | 0.00000000  | 1.66298200  |
| B  | -2.30713900 | 1.42082200  | 0.89254800  |
| B  | 2.30713900  | 1.42082200  | -0.89254800 |
| B  | -2.30713900 | 1.42082200  | -0.89254800 |
| B  | -1.41139700 | 0.89273400  | 2.30404200  |
| B  | 1.41139700  | 0.89273400  | -2.30404200 |
| B  | -1.41139700 | 0.89273400  | -2.30404200 |
| B  | -2.64092000 | 0.00000000  | -1.66298200 |
| B  | -0.89102600 | 2.31680000  | -1.41400200 |
| B  | 0.00000000  | 1.63258100  | 2.62079400  |
| B  | 2.30713900  | 1.42082200  | 0.89254800  |
| B  | 0.89102600  | 2.31680000  | -1.41400200 |
| B  | -0.89102600 | 2.31680000  | 1.41400200  |
| B  | 1.63319900  | 2.63983200  | 0.00000000  |
| B  | 0.89102600  | 2.31680000  | 1.41400200  |
| B  | -1.63319900 | -2.63983200 | 0.00000000  |
| B  | 0.00000000  | -1.63258100 | 2.62079400  |
| B  | 1.41139700  | -0.89273400 | -2.30404200 |
| B  | -2.30713900 | -1.42082200 | -0.89254800 |
| B  | 2.30713900  | -1.42082200 | 0.89254800  |
| B  | -2.30713900 | -1.42082200 | 0.89254800  |
| B  | -1.41139700 | -0.89273400 | -2.30404200 |
| B  | 1.41139700  | -0.89273400 | 2.30404200  |
| B  | -1.41139700 | -0.89273400 | 2.30404200  |
| B  | -0.89102600 | -2.31680000 | 1.41400200  |
| B  | 0.00000000  | -1.63258100 | -2.62079400 |
| B  | 2.30713900  | -1.42082200 | -0.89254800 |
| B  | 0.89102600  | -2.31680000 | 1.41400200  |
| B  | -0.89102600 | -2.31680000 | -1.41400200 |
| B  | 1.63319900  | -2.63983200 | 0.00000000  |
| B  | 0.89102600  | -2.31680000 | -1.41400200 |
| Li | -3.97846600 | 0.00000000  | 0.00000000  |
| Li | 3.97846600  | 0.00000000  | 0.00000000  |
| Ca | 0.00000000  | 0.00000000  | 0.00000000  |

6.  $C_{2v}$   $Li_3[Ca@B_{36}]^+ (^1A_1)$

|    |             |             |             |
|----|-------------|-------------|-------------|
| B  | 0.00000000  | 2.63178200  | 1.70846300  |
| B  | 0.00000000  | -2.64887100 | -1.60294400 |
| B  | 2.63515600  | -1.63017700 | 0.05328800  |
| B  | 1.63171100  | 0.00000000  | 2.67277900  |
| B  | 0.88972000  | 1.41418900  | -2.23957000 |
| B  | 0.00000000  | 2.64887100  | -1.60294400 |
| B  | 1.42774900  | -2.31884100 | -0.83382700 |
| B  | 1.41541000  | 2.29968100  | 0.94778800  |
| B  | 1.41541000  | -2.29968100 | 0.94778800  |
| B  | 0.88972000  | -1.41418900 | -2.23957000 |
| B  | 0.89673400  | 1.41424400  | 2.36244000  |
| B  | 0.89673400  | -1.41424400 | 2.36244000  |
| B  | 0.00000000  | -2.63178200 | 1.70846300  |
| B  | 2.32427900  | -0.89040400 | 1.47183900  |
| B  | 1.65623600  | 0.00000000  | -2.57268100 |
| B  | 1.42774900  | 2.31884100  | -0.83382700 |
| B  | 2.32427900  | 0.89040400  | 1.47183900  |
| B  | 2.31073900  | -0.89444600 | -1.35602800 |
| B  | 2.63515600  | 1.63017700  | 0.05328800  |
| B  | 2.31073900  | 0.89444600  | -1.35602800 |
| B  | -2.63515600 | -1.63017700 | 0.05328800  |
| B  | -1.65623600 | 0.00000000  | -2.57268100 |
| B  | -0.89673400 | 1.41424400  | 2.36244000  |
| B  | -1.41541000 | -2.29968100 | 0.94778800  |
| B  | -1.42774900 | 2.31884100  | -0.83382700 |
| B  | -1.42774900 | -2.31884100 | -0.83382700 |
| B  | -0.89673400 | -1.41424400 | 2.36244000  |
| B  | -0.88972000 | 1.41418900  | -2.23957000 |
| B  | -0.88972000 | -1.41418900 | -2.23957000 |
| B  | -2.31073900 | -0.89444600 | -1.35602800 |
| B  | -1.63171100 | 0.00000000  | 2.67277900  |
| B  | -1.41541000 | 2.29968100  | 0.94778800  |
| B  | -2.31073900 | 0.89444600  | -1.35602800 |
| B  | -2.32427900 | -0.89040400 | 1.47183900  |
| B  | -2.63515600 | 1.63017700  | 0.05328800  |
| B  | -2.32427900 | 0.89040400  | 1.47183900  |
| Li | 0.00000000  | -4.04785400 | 0.06723000  |
| Li | 0.00000000  | 4.04785400  | 0.06723000  |
| Ca | 0.00000000  | 0.00000000  | 0.06871700  |
| Li | 0.00000000  | 0.00000000  | -3.98416000 |

7.  $D_{2h}$  Li<sub>4</sub>&[Ca@B<sub>36</sub>]<sup>2+</sup> (<sup>1</sup>A<sub>g</sub>)

|    |             |             |             |
|----|-------------|-------------|-------------|
| B  | 2.64297000  | 1.64806800  | 0.00000000  |
| B  | -2.64297000 | -1.64806800 | 0.00000000  |
| B  | -1.62660900 | 0.00000000  | 2.62926400  |
| B  | 0.00000000  | 2.62373100  | 1.64719200  |
| B  | 1.41963100  | -2.29915000 | 0.89317300  |
| B  | 2.64297000  | -1.64806800 | 0.00000000  |
| B  | -2.31453700 | -0.88971800 | 1.42324800  |
| B  | 2.31453700  | 0.88971800  | 1.42324800  |
| B  | -2.31453700 | 0.88971800  | 1.42324800  |
| B  | -1.41963100 | -2.29915000 | 0.89317300  |
| B  | 1.41963100  | 2.29915000  | 0.89317300  |
| B  | -1.41963100 | 2.29915000  | 0.89317300  |
| B  | -2.64297000 | 1.64806800  | 0.00000000  |
| B  | -0.89437500 | 1.41524600  | 2.31593200  |
| B  | 0.00000000  | -2.62373100 | 1.64719200  |
| B  | 2.31453700  | -0.88971800 | 1.42324800  |
| B  | 0.89437500  | 1.41524600  | 2.31593200  |
| B  | -0.89437500 | -1.41524600 | 2.31593200  |
| B  | 1.62660900  | 0.00000000  | 2.62926400  |
| B  | 0.89437500  | -1.41524600 | 2.31593200  |
| B  | -1.62660900 | 0.00000000  | -2.62926400 |
| B  | 0.00000000  | -2.62373100 | -1.64719200 |
| B  | 1.41963100  | 2.29915000  | -0.89317300 |
| B  | -2.31453700 | 0.88971800  | -1.42324800 |
| B  | 2.31453700  | -0.88971800 | -1.42324800 |
| B  | -2.31453700 | -0.88971800 | -1.42324800 |
| B  | -1.41963100 | 2.29915000  | -0.89317300 |
| B  | 1.41963100  | -2.29915000 | -0.89317300 |
| B  | -1.41963100 | -2.29915000 | -0.89317300 |
| B  | -0.89437500 | -1.41524600 | -2.31593200 |
| B  | 0.00000000  | 2.62373100  | -1.64719200 |
| B  | 2.31453700  | 0.88971800  | -1.42324800 |
| B  | 0.89437500  | -1.41524600 | -2.31593200 |
| B  | -0.89437500 | 1.41524600  | -2.31593200 |
| B  | 1.62660900  | 0.00000000  | -2.62926400 |
| B  | 0.89437500  | 1.41524600  | -2.31593200 |
| Li | -4.14042000 | 0.00000000  | 0.00000000  |
| Li | 4.14042000  | 0.00000000  | 0.00000000  |
| Ca | 0.00000000  | 0.00000000  | 0.00000000  |
| Li | 0.00000000  | -4.12214600 | 0.00000000  |
| Li | 0.00000000  | 4.12214600  | 0.00000000  |
